# Supplementary material
Source: publisher figshare collection journal article supplement (https://karger.figshare.com/ndownloader/files/26473808)
Supplement: Supplementary file 1 [file 26473808]

| **Supplementary Table 2.** ID and dilution of primary and secondary antibodies. | | |
| --- | --- | --- |
| **Antibody** | **ID** | **Dilution** |
| Primary antibody |  |  |
| BUB1B | UM570007 | 1:500 |
| CD44 | 37259S | 1:500 |
| p53 | 18032S | 1:500 |
| Phosphor-p53 (Ser15) | 9284 | 1:500 |
| β-actin | A5441 | 1:10000 |
| Secondary antibody |  |  |
| Anti-IgG (H+L chain) (Mouse) pAb-HRP | 330 | 1:500 |
| Anti-IgG (H+L chain) (Rabbit) pAb-HRP | 458 | 1:500 |
